# Supplementary material for: Evaluation of aerosol–cloud interactions in E3SM using a Lagrangian framework
Source: Copernicus journal article supplement (doi:10.5194/acp-23-2789-2023), 2023-03-02
Supplement: Supplementary file 2 [file acp-23-2789-2023-supplement.zip]

Archive with 4 entries (4 files):
- supporting_information.pdf
- movie_s2.mp4
- acp-23-2789-2023-supplement-title-page.pdf
- movie_s1.mp4
