# Supplementary material for: Evaluation of aerosol–cloud interactions in E3SM using a Lagrangian framework
Source: Copernicus journal article supplement (doi:10.5194/acp-23-2789-2023), 2023-03-02
Supplement: Supplementary file 2 [file acp-23-2789-2023-supplement.zip › acp-23-2789-2023-supplement-title-page.pdf]

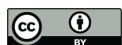

*Supplement of*

## **Evaluation of aerosol–cloud interactions in E3SM using a Lagrangian framework**

**Matthew W. Christensen et al.**

*Correspondence to:* Matthew W. Christensen (matt.christensen@pnnl.gov)

- acp-23-2789-2023-supplement-title-page.pdf
- movie\_s1.mp4
- movie\_s2.mp4
- supporting\_information.pdf

The copyright of individual parts of the supplement might differ from the article licence.
